# Supplementary material for: Variations in Seed Dormancy Occurrence and Their Classifications in Thirteen Actinidia Species
Source: MDPI journal article supplement (doi:10.3390/seeds3020014), 2024-03-22
Supplement: s1 [file s1]

**Supplementary Table S1: Comparative mean germination time (MGT) and germination rate index (GRI) calculated for 13 *Actinidia* species following various dormancy-breaking treatments.**

## Methods

For each sample, several germination summary statistics were calculated: mean germination time (MGT) which reflects the speed of germination, and germination rate index (GRI) which reflects the percentage of germination on each day. The mean (and standard error of the mean) were tabulated for each species – means are without a standard error when only one sample had seeds germinate. All results are for germination under alternating temperature (24/12 °C) conditions.

## Results

### GD: *A. glaucophylla* var. *robusta*

| Fresh/Stratified | Dormancy-breaking treatment | MGT (Days) | GRI (%/day) |
|------------------|-----------------------------|------------|-------------|
| Fresh            | Control                     | 44.8 (0.7) | 1.0 (0.3)   |
| Fresh            | Soaking                     | 46.0 (0.0) | 0.2 (0.0)   |
| Fresh            | Clipping                    | 43.1 (2.1) | 0.2 (0.1)   |
| Fresh            | GA3                         | 39.0       | 0.0 (0.0)   |
| Fresh            | Sanding                     | 47.9 (2.4) | 0.7 (0.2)   |
| Fresh            | Seed coat removal           | 35.5 (2.7) | 0.6 (0.1)   |
| Stratified       | Control                     | 42.8 (0.4) | 1.6 (0.1)   |
| Stratified       | Soaking                     | 42.1 (0.3) | 2.5 (0.3)   |
| Stratified       | Clipping                    | 39.1 (1.0) | 2.5 (0.4)   |
| Stratified       | GA3                         | 41.3 (0.5) | 3.8 (0.2)   |
| Stratified       | Sanding                     | 41.0 (1.0) | 2.1 (0.4)   |
| Stratified       | Seed coat removal           | 43.5 (1.5) | 1.1 (0.5)   |

### AE: *A. arguta* var. *purpurea*

| Fresh/Stratified | Dormancy-breaking treatment | MGT (Days) | GRI (%/day) |
|------------------|-----------------------------|------------|-------------|
| Fresh            | Control                     | 35.3 (1.3) | 3.9 (0.2)   |
| Fresh            | Soaking                     | 35.9 (0.7) | 4.8 (0.8)   |
| Fresh            | Clipping                    | 36.4 (2.9) | 1.3 (0.5)   |
| Fresh            | GA3                         | 31.0 (1.6) | 5.9 (0.8)   |
| Fresh            | Sanding                     | 42.2 (0.9) | 2.6 (0.4)   |
| Fresh            | Seed coat removal           | 42.3 (1.4) | 1.6 (0.2)   |
| Stratified       | Control                     |            | 0.0 (0.0)   |
| Stratified       | Soaking                     | 26.0 (0.0) | 0.1 (0.1)   |
| Stratified       | Clipping                    | 20.5 (4.8) | 0.7 (0.3)   |
| Stratified       | GA3                         | 18.0 (0.0) | 0.1 (0.1)   |
| Stratified       | Sanding                     | 26.0 (0.0) | 0.4 (0.1)   |
| Stratified       | Seed coat removal           | 18.0 (0.0) | 0.6 (0.3)   |

VA: *A. valvata* var. *valvata*

| Fresh/Stratified | Dormancy-breaking treatment | MGT (Days)  | GRI (%/day) |
|------------------|-----------------------------|-------------|-------------|
| Fresh            | Control                     | 25.2 (1.2)  | 2.7 (1.0)   |
| Fresh            | Soaking                     | 29.0 (0.0)  | 8.4 (0.2)   |
| Fresh            | Clipping                    | 28.3 (2.5)  | 4.5 (1.6)   |
| Fresh            | GA3                         | 24.3 (0.1)  | 7.8 (2.6)   |
| Fresh            | Sanding                     | 36.7 (3.8)  | 3.0 (1.3)   |
| Fresh            | Seed coat removal           | 35.4 (2.4)  | 1.8 (0.4)   |
| Stratified       | Control                     |             | 0.0 (0.0)   |
| Stratified       | Soaking                     |             | 0.0 (0.0)   |
| Stratified       | Clipping                    | 25.4 (0.2)  | 3.4 (0.1)   |
| Stratified       | GA3                         |             | 0.0 (0.0)   |
| Stratified       | Sanding                     |             | 0.0 (0.0)   |
| Stratified       | Seed coat removal           | 28.5 (10.5) | 1.1 (0.8)   |

LB: *A. lanceolata*

| Fresh/Stratified | Dormancy-breaking treatment | MGT (Days) | GRI (%/day) |
|------------------|-----------------------------|------------|-------------|
| Fresh            | Control                     | 28.7 (1.1) | 2.4 (1.9)   |
| Fresh            | Soaking                     | 38.3 (6.5) | 0.3 (0.1)   |
| Fresh            | Clipping                    | 38.4 (1.3) | 1.0 (0.4)   |
| Fresh            | GA3                         | 34.8 (2.2) | 1.0 (0.3)   |
| Fresh            | Sanding                     | 37.5 (2.5) | 0.7 (0.3)   |
| Fresh            | Seed coat removal           | 39.0       | 0.1 (0.1)   |
| Stratified       | Control                     | 23.7 (1.1) | 1.1 (0.2)   |
| Stratified       | Soaking                     | 18.3 (1.0) | 1.5 (0.3)   |
| Stratified       | Clipping                    | 25.5 (0.8) | 1.1 (0.3)   |
| Stratified       | GA3                         | 17.9 (1.0) | 2.3 (0.4)   |
| Stratified       | Sanding                     | 28.2 (1.2) | 1.4 (0.1)   |
| Stratified       | Seed coat removal           | 28.3 (0.4) | 2.1 (0.5)   |

AA: *A. arguta* var. *arguta*

There was no germination for the “Fresh” seeds.

| Fresh/Stratified | Dormancy-breaking treatment | MGT (Days) | GRI (%/day) |
|------------------|-----------------------------|------------|-------------|
| Fresh            | Control                     |            | 0.0 (0.0)   |
| Fresh            | Soaking                     |            | 0.0 (0.0)   |
| Fresh            | Clipping                    |            | 0.0 (0.0)   |
| Fresh            | GA3                         |            | 0.0 (0.0)   |
| Fresh            | Sanding                     |            | 0.0 (0.0)   |
| Fresh            | Seed coat removal           |            | 0.0 (0.0)   |
| Stratified       | Control                     | 25.5 (0.6) | 4.2 (0.2)   |
| Stratified       | Soaking                     | 28.0 (0.8) | 3.4 (0.5)   |
| Stratified       | Clipping                    | 29.0 (1.0) | 6.3 (0.7)   |
| Stratified       | GA3                         | 25.9 (0.3) | 3.7 (0.7)   |
| Stratified       | Sanding                     | 26.5 (0.3) | 6.0 (0.9)   |
| Stratified       | Seed coat removal           | 29.5 (2.5) | 2.1 (0.7)   |

CK: *A. chinensis* var. *chinensis*

| Fresh/Stratified | Dormancy-breaking treatment | MGT (Days) | GRI (%/day) |
|------------------|-----------------------------|------------|-------------|
| Fresh            | Control                     | 46.0       | 0.0 (0.0)   |
| Fresh            | Soaking                     | 42.7 (3.3) | 0.2 (0.2)   |
| Fresh            | Clipping                    | 26.3 (2.3) | 0.4 (0.3)   |
| Fresh            | GA3                         | 46.3 (1.0) | 0.6 (0.1)   |
| Fresh            | Sanding                     |            | 0.0 (0.0)   |
| Fresh            | Seed coat removal           |            | 0.0 (0.0)   |
| Stratified       | Control                     | 45.0       | 0.0 (0.0)   |
| Stratified       | Soaking                     | 33.0 (0.0) | 0.2 (0.1)   |
| Stratified       | Clipping                    | 35.0 (0.6) | 2.0 (0.4)   |
| Stratified       | GA3                         | 28.8 (3.4) | 0.9 (0.4)   |
| Stratified       | Sanding                     | 27.0 (1.4) | 0.7 (0.2)   |
| Stratified       | Seed coat removal           | 38.3 (3.9) | 1.2 (0.5)   |

DA: *A. chinensis* var. *deliciosa*

| Fresh/Stratified | Dormancy-breaking treatment | MGT (Days) | GRI (%/day) |
|------------------|-----------------------------|------------|-------------|
| Fresh            | Control                     | 34.9 (2.2) | 0.3 (0.0)   |
| Fresh            | Soaking                     |            | 0.0 (0.0)   |
| Fresh            | Clipping                    | 31.0 (0.0) | 0.5 (0.3)   |
| Fresh            | GA3                         | 16.0       | 0.2 (0.2)   |
| Fresh            | Sanding                     | 24.0 (0.0) | 0.5 (0.2)   |
| Fresh            | Seed coat removal           | 31.0       | 0.1 (0.1)   |
| Stratified       | Control                     | 27.0 (1.5) | 0.9 (0.2)   |
| Stratified       | Soaking                     | 30.5 (5.5) | 0.2 (0.1)   |
| Stratified       | Clipping                    | 27.4 (1.7) | 3.8 (0.8)   |
| Stratified       | GA3                         | 26.5 (1.1) | 3.3 (0.4)   |
| Stratified       | Sanding                     | 25.5 (0.5) | 0.9 (0.2)   |
| Stratified       | Seed coat removal           | 27.8 (2.3) | 3.0 (0.1)   |

DD: *A. chinensis* var. *coloris*

| Fresh/Stratified | Dormancy-breaking treatment | MGT (Days) | GRI (%/day) |
|------------------|-----------------------------|------------|-------------|
| Fresh            | Control                     | 26.3 (2.3) | 1.9 (0.5)   |
| Fresh            | Soaking                     | 27.8 (1.8) | 1.4 (0.4)   |
| Fresh            | Clipping                    | 54.7 (2.3) | 0.2 (0.1)   |
| Fresh            | GA3                         | 32.6 (3.4) | 1.3 (0.3)   |
| Fresh            | Sanding                     | 39.6 (2.1) | 1.5 (1.0)   |
| Fresh            | Seed coat removal           | 29.7 (0.7) | 1.1 (0.5)   |
| Stratified       | Control                     |            | 0.0 (0.0)   |
| Stratified       | Soaking                     |            | 0.0 (0.0)   |
| Stratified       | Clipping                    | 24.7 (0.8) | 6.6 (0.9)   |
| Stratified       | GA3                         | 18.0       | 0.1 (0.1)   |
| Stratified       | Sanding                     | 22.7 (3.0) | 2.1 (0.4)   |
| Stratified       | Seed coat removal           | 20.1 (1.9) | 5.5 (2.3)   |

EA: *A. eriantha* f. *eriantha*

| Fresh/Stratified | Dormancy-breaking treatment | MGT (Days) | GRI (%/day) |
|------------------|-----------------------------|------------|-------------|
| Fresh            | Control                     |            | 0.0 (0.0)   |
| Fresh            | Soaking                     | 53.0 (4.0) | 0.1 (0.0)   |
| Fresh            | Clipping                    |            | 0.0 (0.0)   |
| Fresh            | GA3                         | 42.0       | 0.1 (0.1)   |
| Fresh            | Sanding                     |            | 0.0 (0.0)   |
| Fresh            | Seed coat removal           | 27.0 (1.1) | 1.0 (0.3)   |
| Stratified       | Control                     |            | 0.0 (0.0)   |
| Stratified       | Soaking                     | 46.0       | 0.0 (0.0)   |
| Stratified       | Clipping                    | 41.5 (0.9) | 0.5 (0.1)   |
| Stratified       | GA3                         | 46.0 (0.0) | 0.1 (0.0)   |
| Stratified       | Sanding                     |            | 0.0 (0.0)   |
| Stratified       | Seed coat removal           | 46.0       | 0.1 (0.1)   |

PC: *A. polygama*

| Fresh/Stratified | Dormancy-breaking treatment | MGT (Days) | GRI (%/day) |
|------------------|-----------------------------|------------|-------------|
| Fresh            | Control                     | 31.3 (7.3) | 0.3 (0.1)   |
| Fresh            | Soaking                     |            | 0.0 (0.0)   |
| Fresh            | Clipping                    | 30.4 (0.6) | 1.2 (0.6)   |
| Fresh            | GA3                         |            | 0.0 (0.0)   |
| Fresh            | Sanding                     | 31.3 (3.1) | 0.5 (0.1)   |
| Fresh            | Seed coat removal           | 42.3 (3.7) | 0.2 (0.1)   |
| Stratified       | Control                     | 26.9 (0.7) | 1.3 (0.0)   |
| Stratified       | Soaking                     | 26.6 (0.9) | 1.5 (0.4)   |
| Stratified       | Clipping                    | 23.1 (1.8) | 13.2 (1.6)  |
| Stratified       | GA3                         | 26.8 (0.7) | 2.4 (0.1)   |
| Stratified       | Sanding                     | 25.0 (2.4) | 1.3 (0.1)   |
| Stratified       | Seed coat removal           | 40.7 (4.0) | 0.8 (0.3)   |
